# Supplementary material for: Association of TNFα -308G/A and IL10 -1082A/G Polymorphisms with Pulmonary Tuberculosis Susceptibility in a Brazilian population
Source: Research Square preprint supplement (doi:10.21203/rs.3.rs-2150864/v1), 2022-11-19
Supplement: Supplementary file 1 [file 1314c0914af51d1b0bae53e3.docx]

**Table 2 –** Allele and genotype frequencies of the rs1800896 *IL10* (-1082A/G) and rs1800629 *TNFα* (-308G/A) polymorphisms, and comparison among patients’ groups to assess genetic association with susceptibility to pulmonary tuberculosis.

|  | **PTB+** | **Controls (n=211)** | | | ***p*-value; OR [95% CI] *** | | | |
| --- | --- | --- | --- | --- | --- | --- | --- | --- |
| **SNP** |  |  | | |  | | | |
|  | **Total**  **n=71 (%)** | **TB- 1**  **n=53 (%)** | **TB- 2**  **n=57 (%)** | **Healthy Control**  **n=101 (%)** | **PTB+ vs. TB- 1** | **PTB+ vs. TB- 2** | **PTB+ vs. Healthy Control** | **PTB+ vs. Controls** |
| ***IL10* (-1082 A/G, rs1800896)** | | | | | | | | |
| Alleles |  |  | | |  | | | |
| A | 76 (53.5) | 56 (52.8) | 67 (58.8) | 154 (76.2) | Ref | Ref | Ref | Ref |
| G | 66 (46.5) | 50 (47.2) | 47 (41.2) | 48 (23.8) | 1; 0.972  [0.569 – 1.662] | 0.448; 1.237  [0.730 – 2.101] | **<0.001; 2.777**  **[1.710 – 4.544]** | **0.012; 1.658**  **[1.105 – 2.484]** |
| Genotypes |  |  | | |  | | | |
| AA | 23 (32.4) | 18 (34.0) | 22 (38.6) | 60 (59.4) | Ref | Ref | Ref | Ref |
| AG | 30 (42.3) | 20 (37.7) | 23 (40.4) | 34 (33.7) | 0.831; 1.172  [0.467 – 2.942] | 0.685; 1.245  [0.521 – 2.988] | **0.024; 2.289**  **[1.095 – 4.849]** | 0.116; 1.689  [0.872 – 3.311] |
| GG | 18 (25.3) | 15 (28.3) | 12 (21.0) | 7 (6.9) | 1; 0.939  [0.339 – 2.612] | 0.486; 1.428  [0.511 – 4.081] | **<0.001; 6.572**  **[2.262 – 21.242]** | **0.031; 2.289**  **[1.032 – 5.057]** |
| ***TNF* (-308 G/A, rs1800629)** | | | | | | | | |
| Alleles |  |  |  |  |  |  |  |  |
| G | 107 (75.4) | 78 (73.6) | 82 (71.9) | 139 (68.8) | Ref | Ref | Ref | Ref |
| A | 35 (24.6) | 28 (26.4) | 32 (28.1) | 63 (31.2) | 0.769; 0.912  [0.493 – 1.695] | 0.569; 0.839  [0.462 – 1.527] | 0.225; 0.722  [0.430 – 1.201] | 0.332; 0.795  [0.498 – 1.249] |
| Genotypes |  |  | | |  | | | |
| GG | 44 (62.0) | 31 (58.5) | 32 (56.1) | 44 (43.6) | Ref | Ref | Ref | Ref |
| GA | 19 (26.8) | 16 (30.2) | 18 (31.6) | 51 (50.5) | 0.684; 0.838  [0.346 – 2.041] | 0.549; 0.769  [0.324 – 1.826] | **0.005; 0.375**  **[0.179 – 0.766]** | 0.055; 0.545  [0.279 – 1.035] |
| AA | 8 (11.2) | 6 (11.3) | 7 (12.3) | 6 (5.9) | 1; 0.940  [0.256 – 3.640] | 0.781; 0.833  [0.236 – 3.001] | 0.775; 1.329  [0.369 – 5.063] | 1; 1.024  [0.359 – 2.676] |

*Genetic association by Fisher exact test.

CI: confidence interval; OR: Odds Ratio; PTB: pulmonary tuberculosis; TB: tuberculosis.
