# Supplementary material for: Association of TNFα -308G/A and IL10 -1082A/G Polymorphisms with Pulmonary Tuberculosis Susceptibility in a Brazilian population
Source: Research Square preprint supplement (doi:10.21203/rs.3.rs-2150864/v1), 2022-11-19
Supplement: Supplementary file 2 [file e8403b000bc59a44b08fd9a4.docx]

**Table 1 –** Sociodemographic, epidemiological, clinical, and laboratorial characteristics of PTB positive and TB negative patients enrolled in our study.

| **Variables** | | **PTB+**  **n = 71 (%)** | **TB- 1**  **n = 53 (%)** | **TB- 2**  **n = 57 (%)** | ***P*** |
| --- | --- | --- | --- | --- | --- |
| Sex | Male | 46 (64.8) | 27 (51) | 23 (40.3) | **0.014** |
|  | Female | 25 (35.2) | 26 (49) | 34 (59.7) |
| Age (years old), mean ± SD* |  | 43.1 ± 15.2 | 48.2 ± 20.2 | 51.6 ± 16.8 | **0.007*** |
| Smoking | Yes | 12 (17) | 16 (30) | 12 (21) | 0.846 |
|  | No | 40 (56.3) | 35 (66) | 45 (79) |
|  | Unknown | 19 (26.7) | 02 (4) | 0 (0) | - |
| Alcohol use | Yes | 10 (14) | 10 (19) | 2 (3.5) | 0.219 |
|  | No | 42 (59.2) | 41 (77.3) | 55 (96.5) |
|  | Unknown | 19 (26.8) | 02 (3.7) | 0 (0) | - |
| SAH carrier | Yes | 5 (7.5) | 7 (13.2) | 8 (14) | 0.610 |
|  | No | 45 (63) | 43 (81.1) | 48 (84.2) |
|  | Unknown | 21 (29.5) | 3 (5.7) | 1 (1.8) | - |
| DM carrier | Yes | 5 (7.2) | 5 (9.4) | 5 (9) | 1.00 |
|  | No | 45 (63.3) | 46 (87) | 52 (91) |
|  | Unknown | 21 (29.5) | 2 (3.6) | 0 (0) | - |
| ***Diagnostic exams*** | | | | |  |
| TST | Positive | 49 (69) | 53 (100) | 0 (0) | - |
|  | Negative | 8 (11) | 0 (0) | 57 (100) |
|  | Unknown | 14 (20) | 0 (0) | 0 (0) |
| X-ray | Normal | 2 (2.8) | 32 (60.4) | 31 (54.4) | - |
|  | Altered | 46 (64.8) | 11 (20.8) | 10 (17.5) |
|  | Unknown | 23 (32.4) | 10 (18.8) | 16 (28.1) |
| Bacilloscopy | Positive | 58 (82) | 0 (0) | 0 (0) | - |
|  | Negative | 10 (14) | 40 (75.5) | 45 (79) |
|  | Unknown | 3 (4) | 13 (24.5) | 12 (21) |
| Culture for *M. tuberculosis* | Positive | 47 (66.2) | 0 (0) | 0 (0) | - |
|  | Negative | 0 (0) | 53 (100) | 57 (100) |
|  | Unknown | 24 (33.8) | 0 (0) | 0 (0) |

* t-test (Shapiro-Wilk test: >0.05).

DM: Diabetes mellitus; PTB: pulmonary tuberculosis; SAH: systemic arterial hypertension; TB: tuberculosis; TST: Mantoux tuberculin skin test.
