# Supplementary material for: Association of TNFα -308G/A and IL10 -1082A/G Polymorphisms with Pulmonary Tuberculosis Susceptibility in a Brazilian population
Source: Research Square preprint supplement (doi:10.21203/rs.3.rs-2150864/v1), 2022-11-19
Supplement: Supplementary file 3 [file fdcba3e18f3508ddddf47123.docx]

**Table 3 –** Variables included in a fitted logistic regression model to explain susceptibility to pulmonary tuberculosis.

| **Variables** | **Estimate (β)*** | **OR** | **95% CI** | ***P*** |
| --- | --- | --- | --- | --- |
| -308 G/A (*TNFα*) genotypes a | -0.95125 | 0,3863 | 0,1724 – 0.8654 | **0,0208** |
| -1082 A/G (*IL10*) genotypes b | 2.07913 | 7,9975 | 2,7195 – 23.5192 | **0,0002** |
| Male sex | 2.2035 | 13,7405 | 5,7935 – 32.5887 | **<0,0001** |
| Age | 0.02927 | 1,0297 | 1,0053 – 1.0547 | **0,0167** |
| (intercept) | -0.39972 | _ | _ | 0,5755 |

CI: confidence interval; OR: odds ratio.

a GG versus GA and AA genotypes.

b AA versus AG and GG genotypes.

*Model’s internal validation: AUROC=0.8513; Z=0.1204; *P*=0.9042.
